# Supplementary material
Source: ML conference proceedings conference paper supplement (https://openreview.net/forum?id=_4F4CDK9Mo)

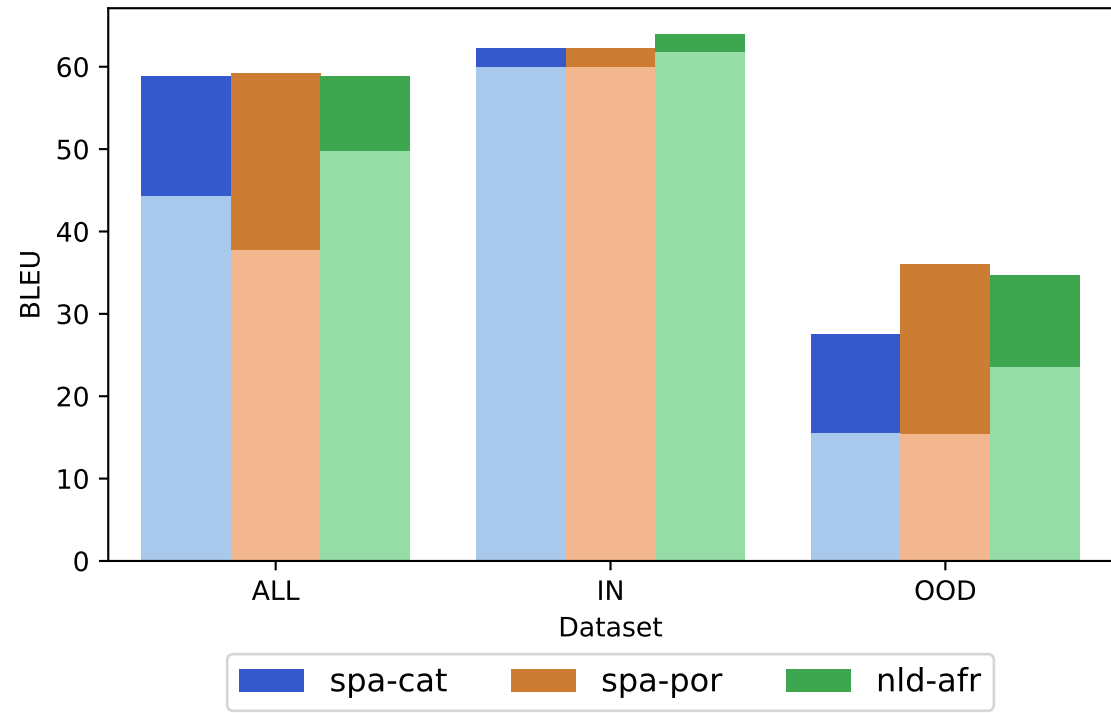

Supplement: supplementary_material [file attachment]

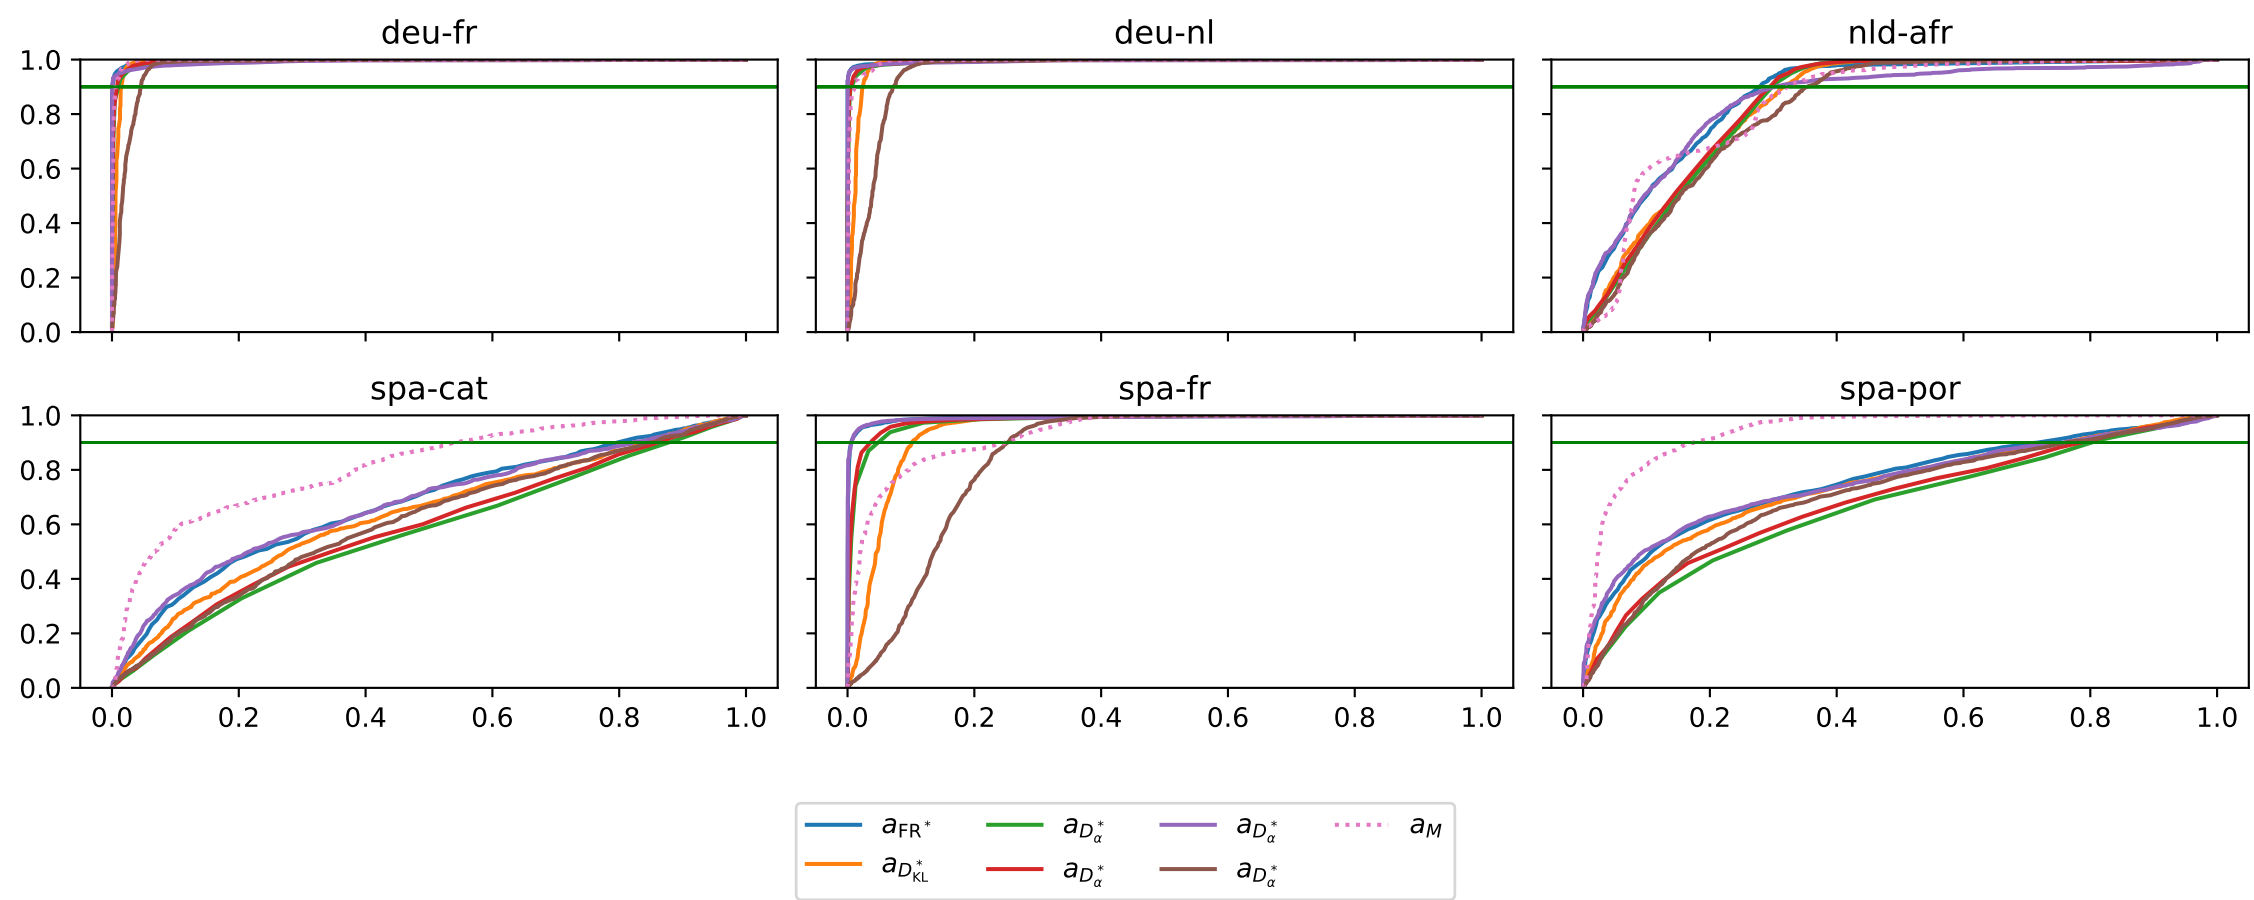

Supplement: supplementary_material [file attachment]

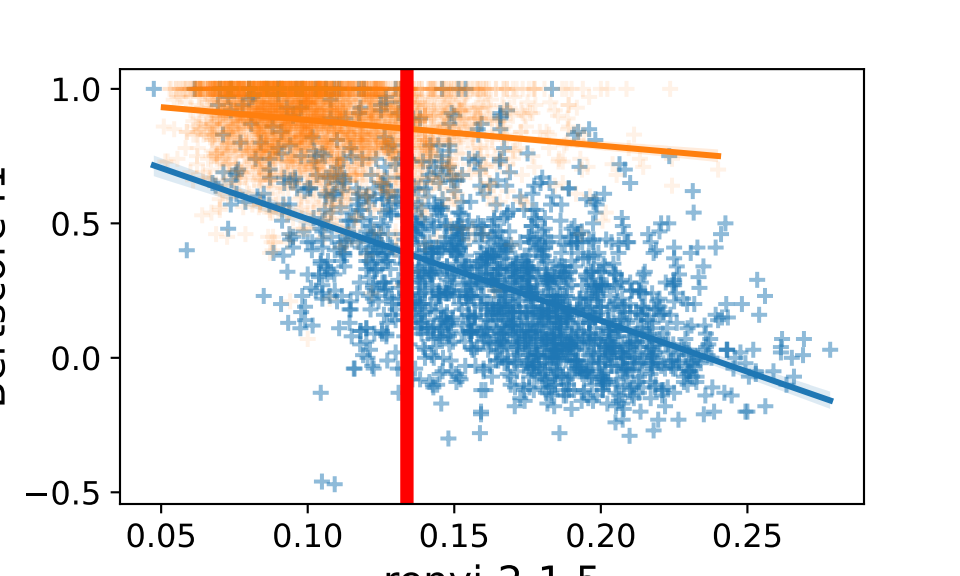

Supplement: supplementary_material [file attachment]

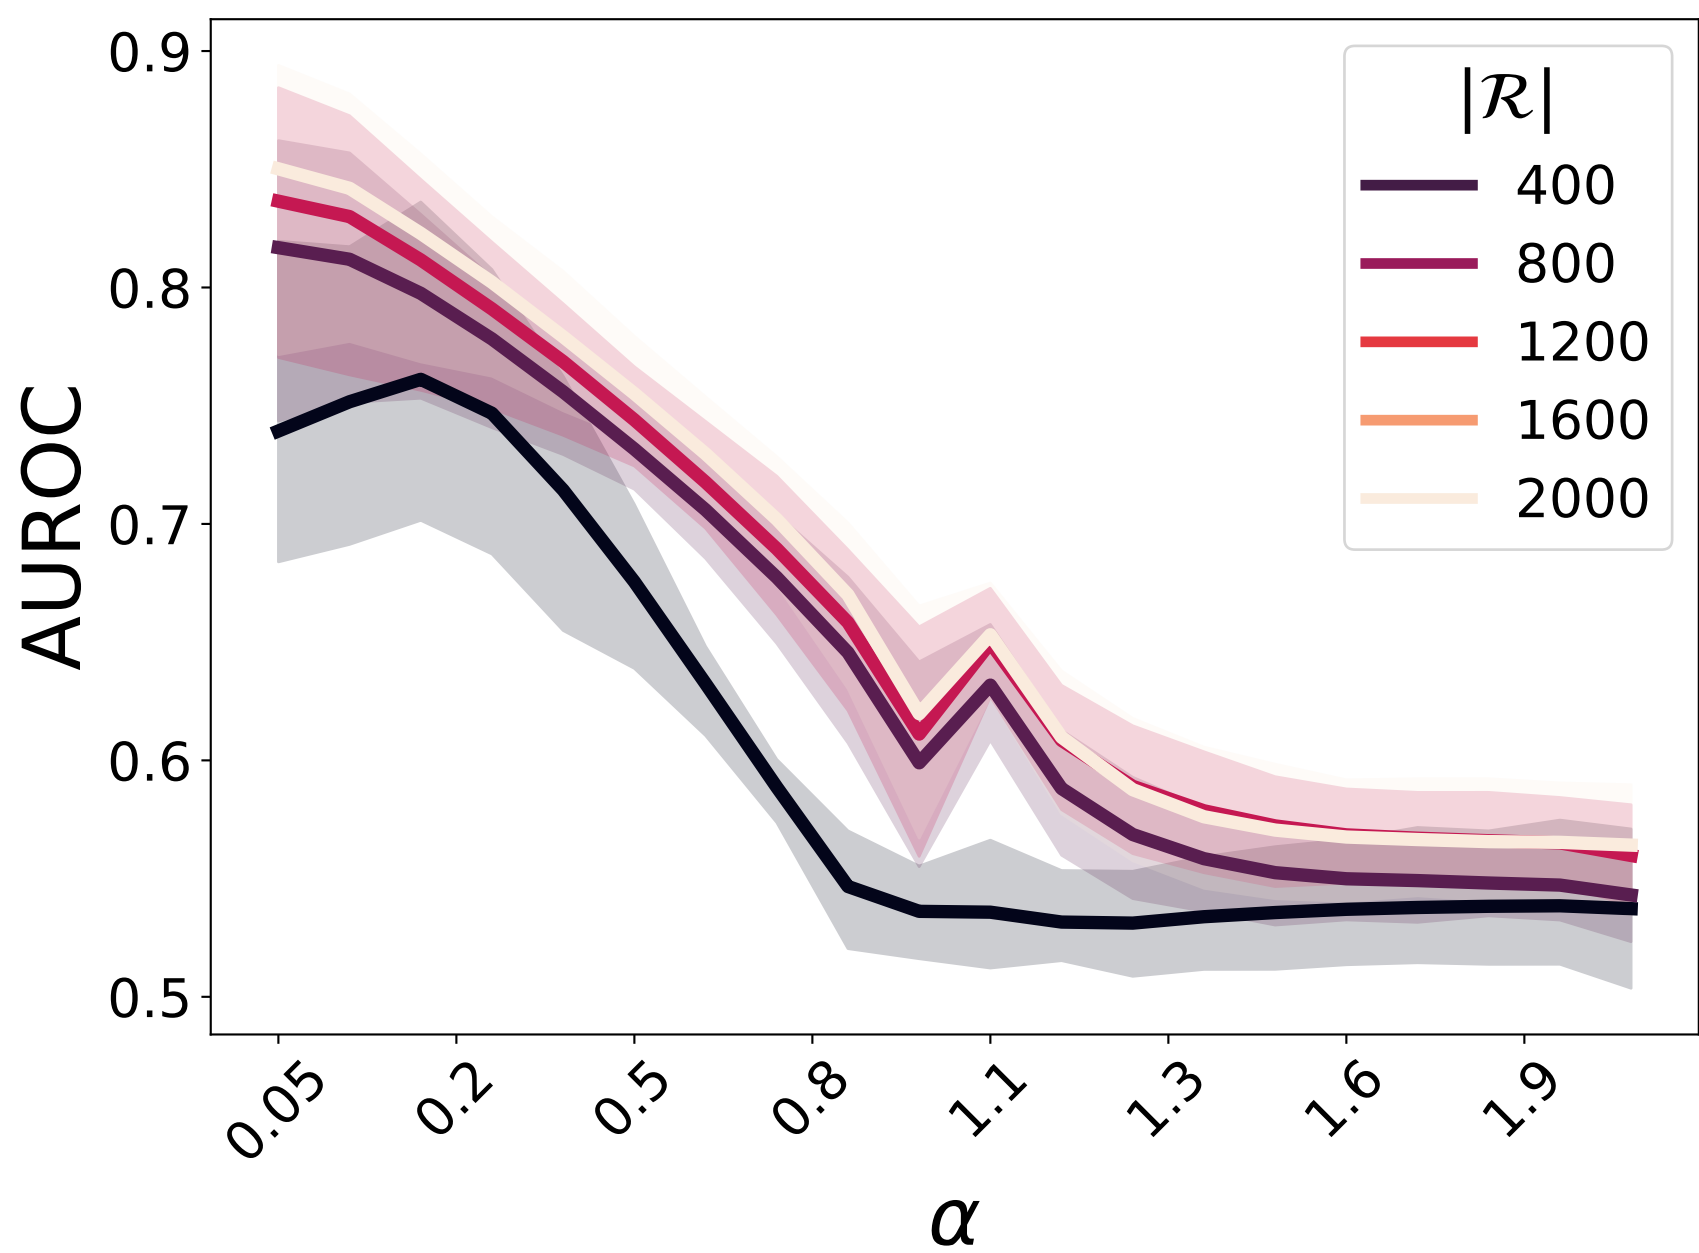

Supplement: supplementary_material [file attachment]

Language shifts

Domain shifts

Dialog shifts

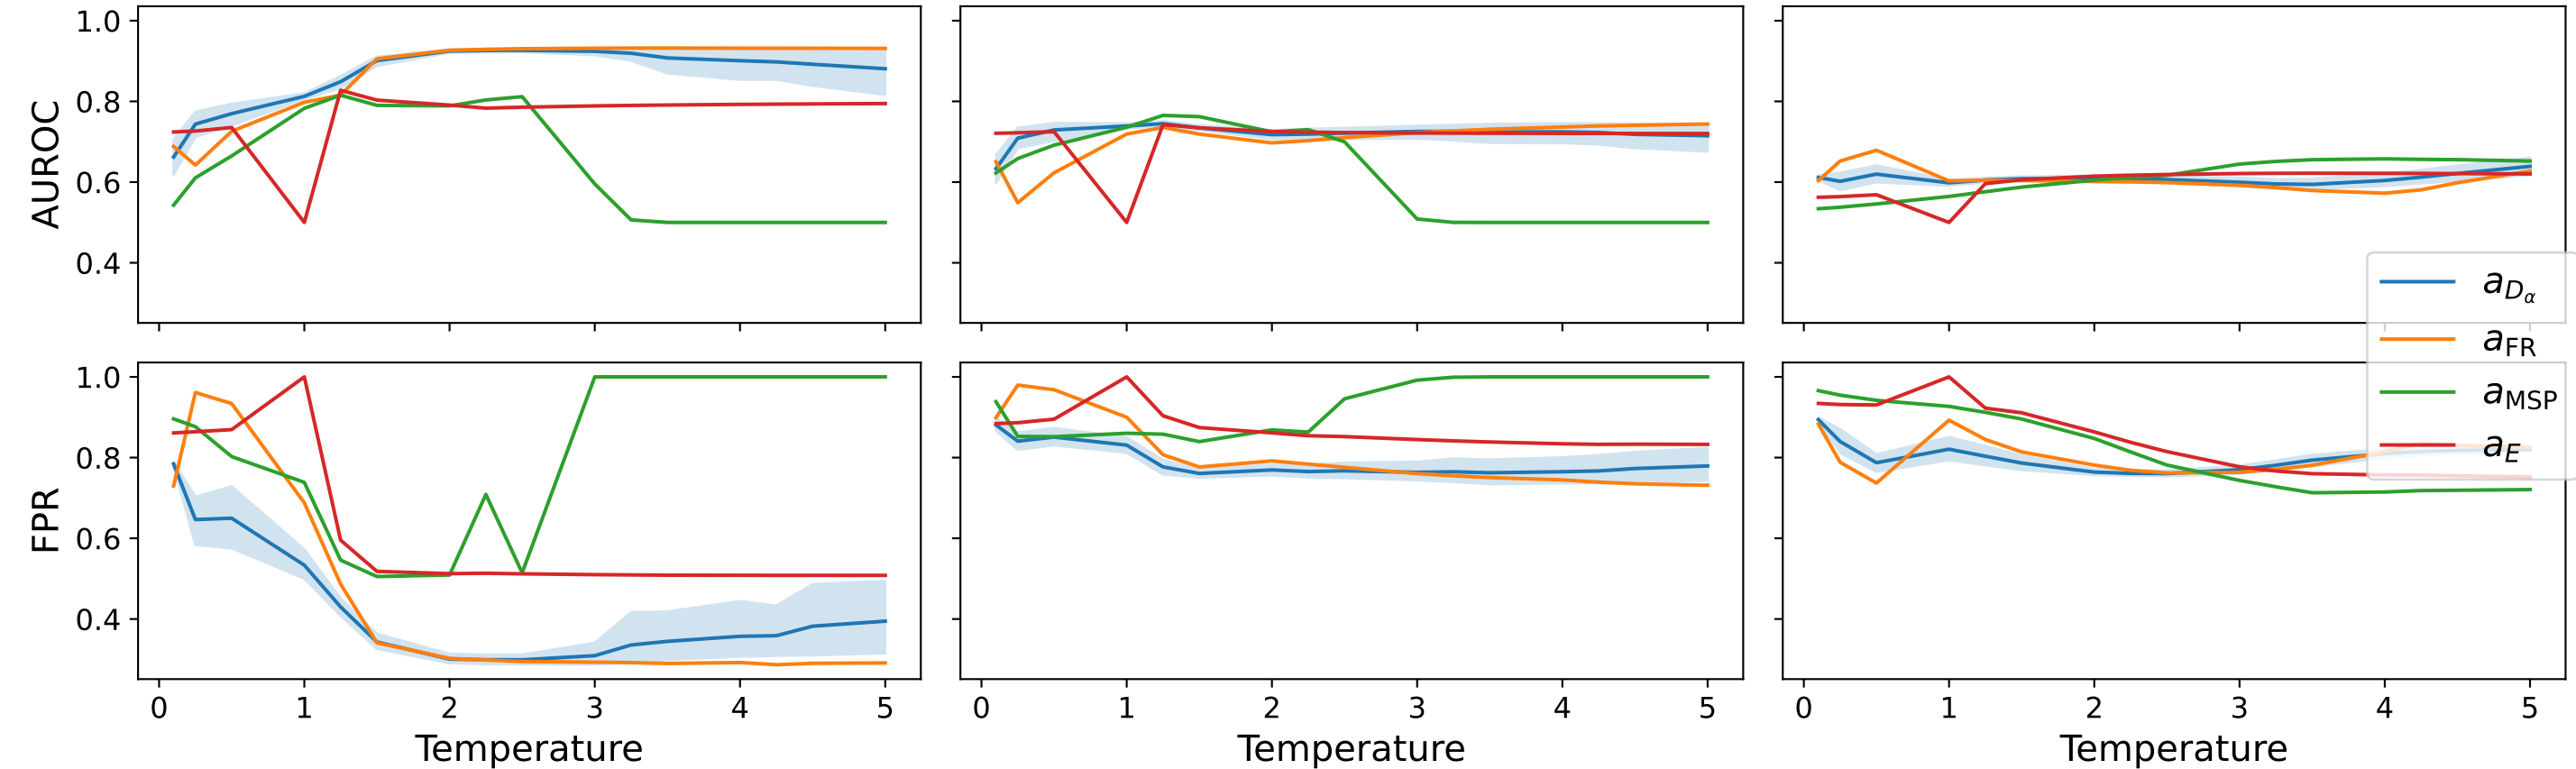

Supplement: supplementary_material [file attachment]

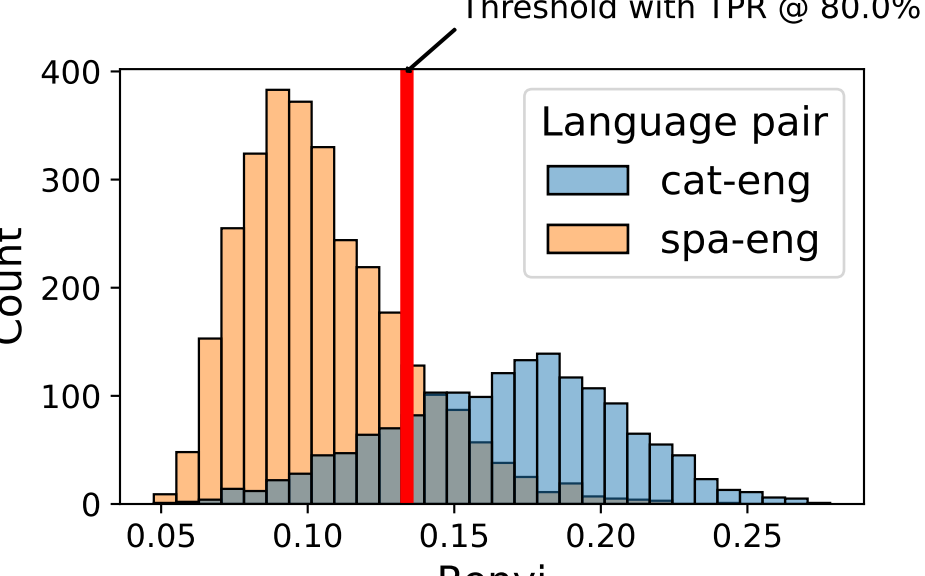

Supplement: supplementary_material [file attachment]

Bleu score

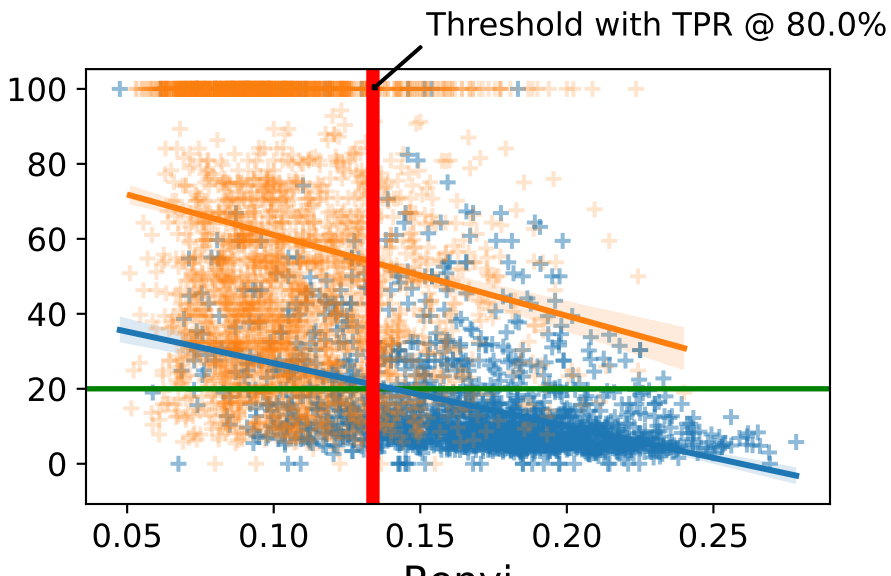

Supplement: supplementary_material [file attachment]

daily\_dialog-default

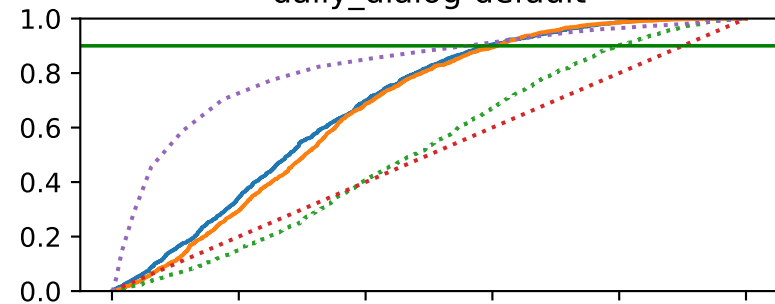

dyda\_da

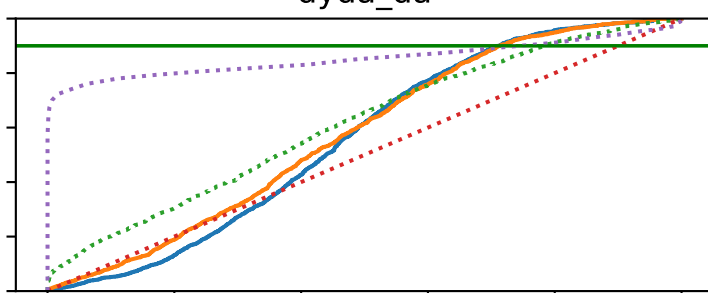

iemocap

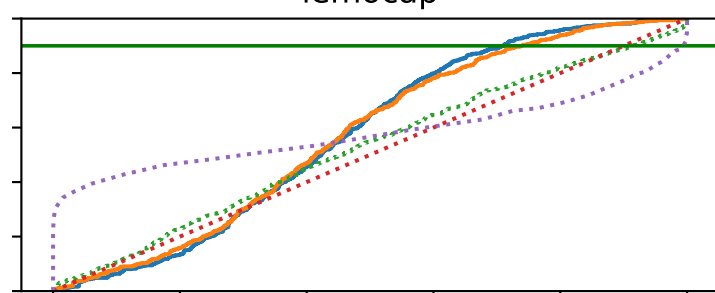

meld\_s

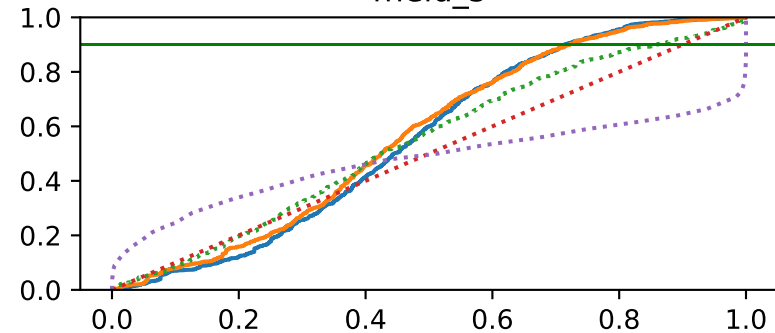

mrda

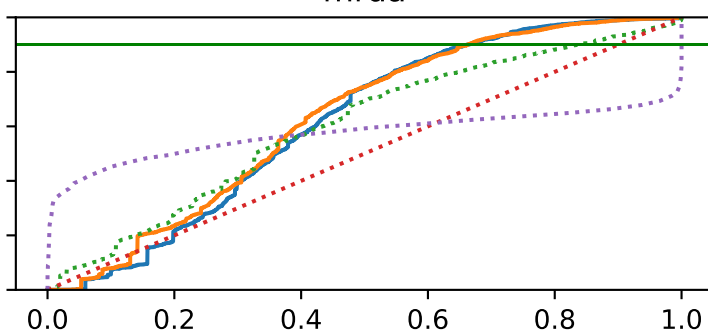

swda

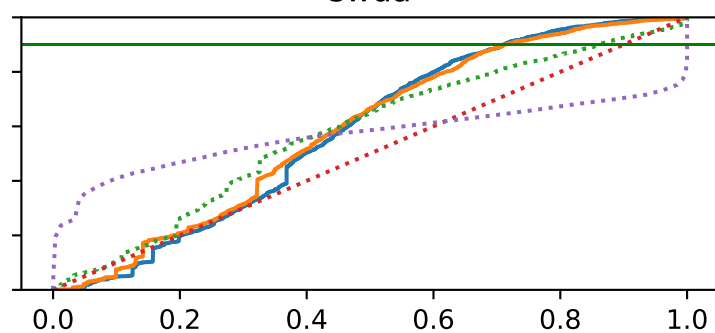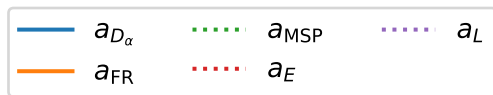

Supplement: supplementary_material [file attachment]

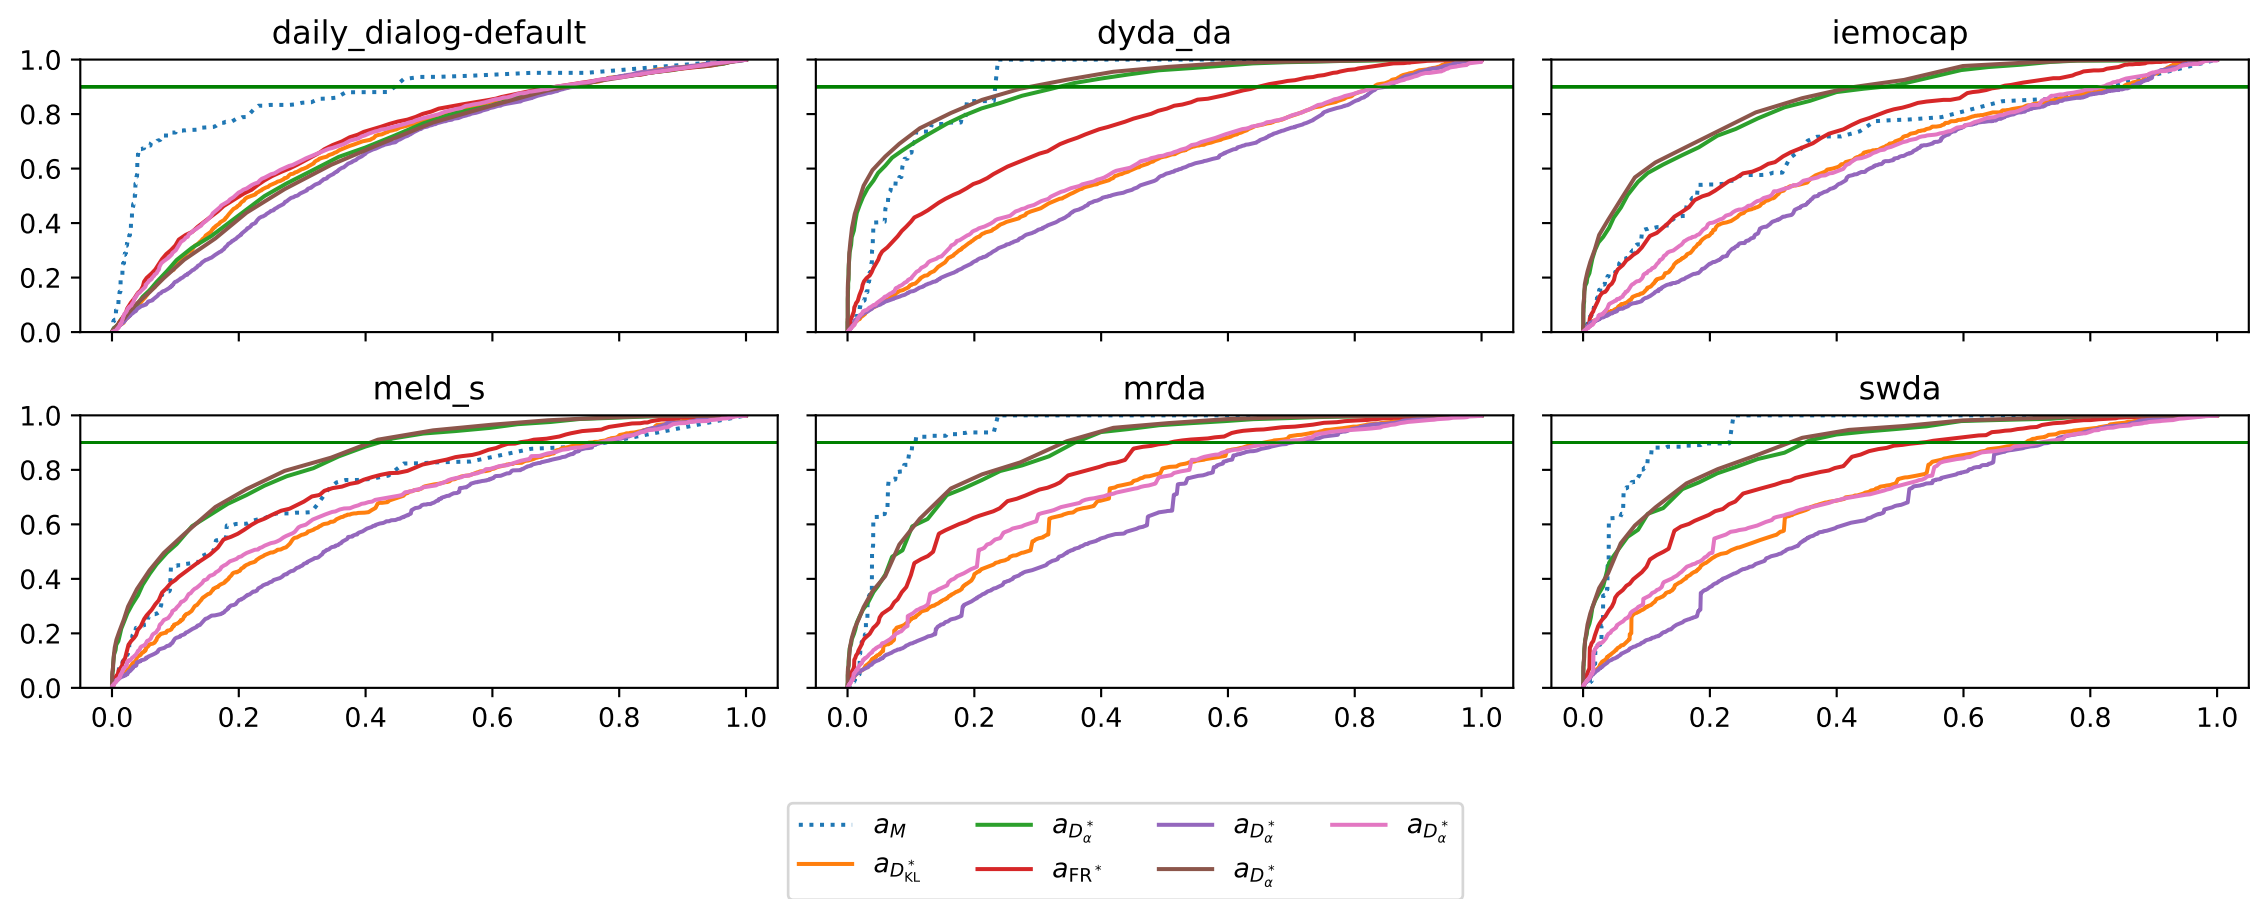

Supplement: supplementary_material [file attachment]

AUROC

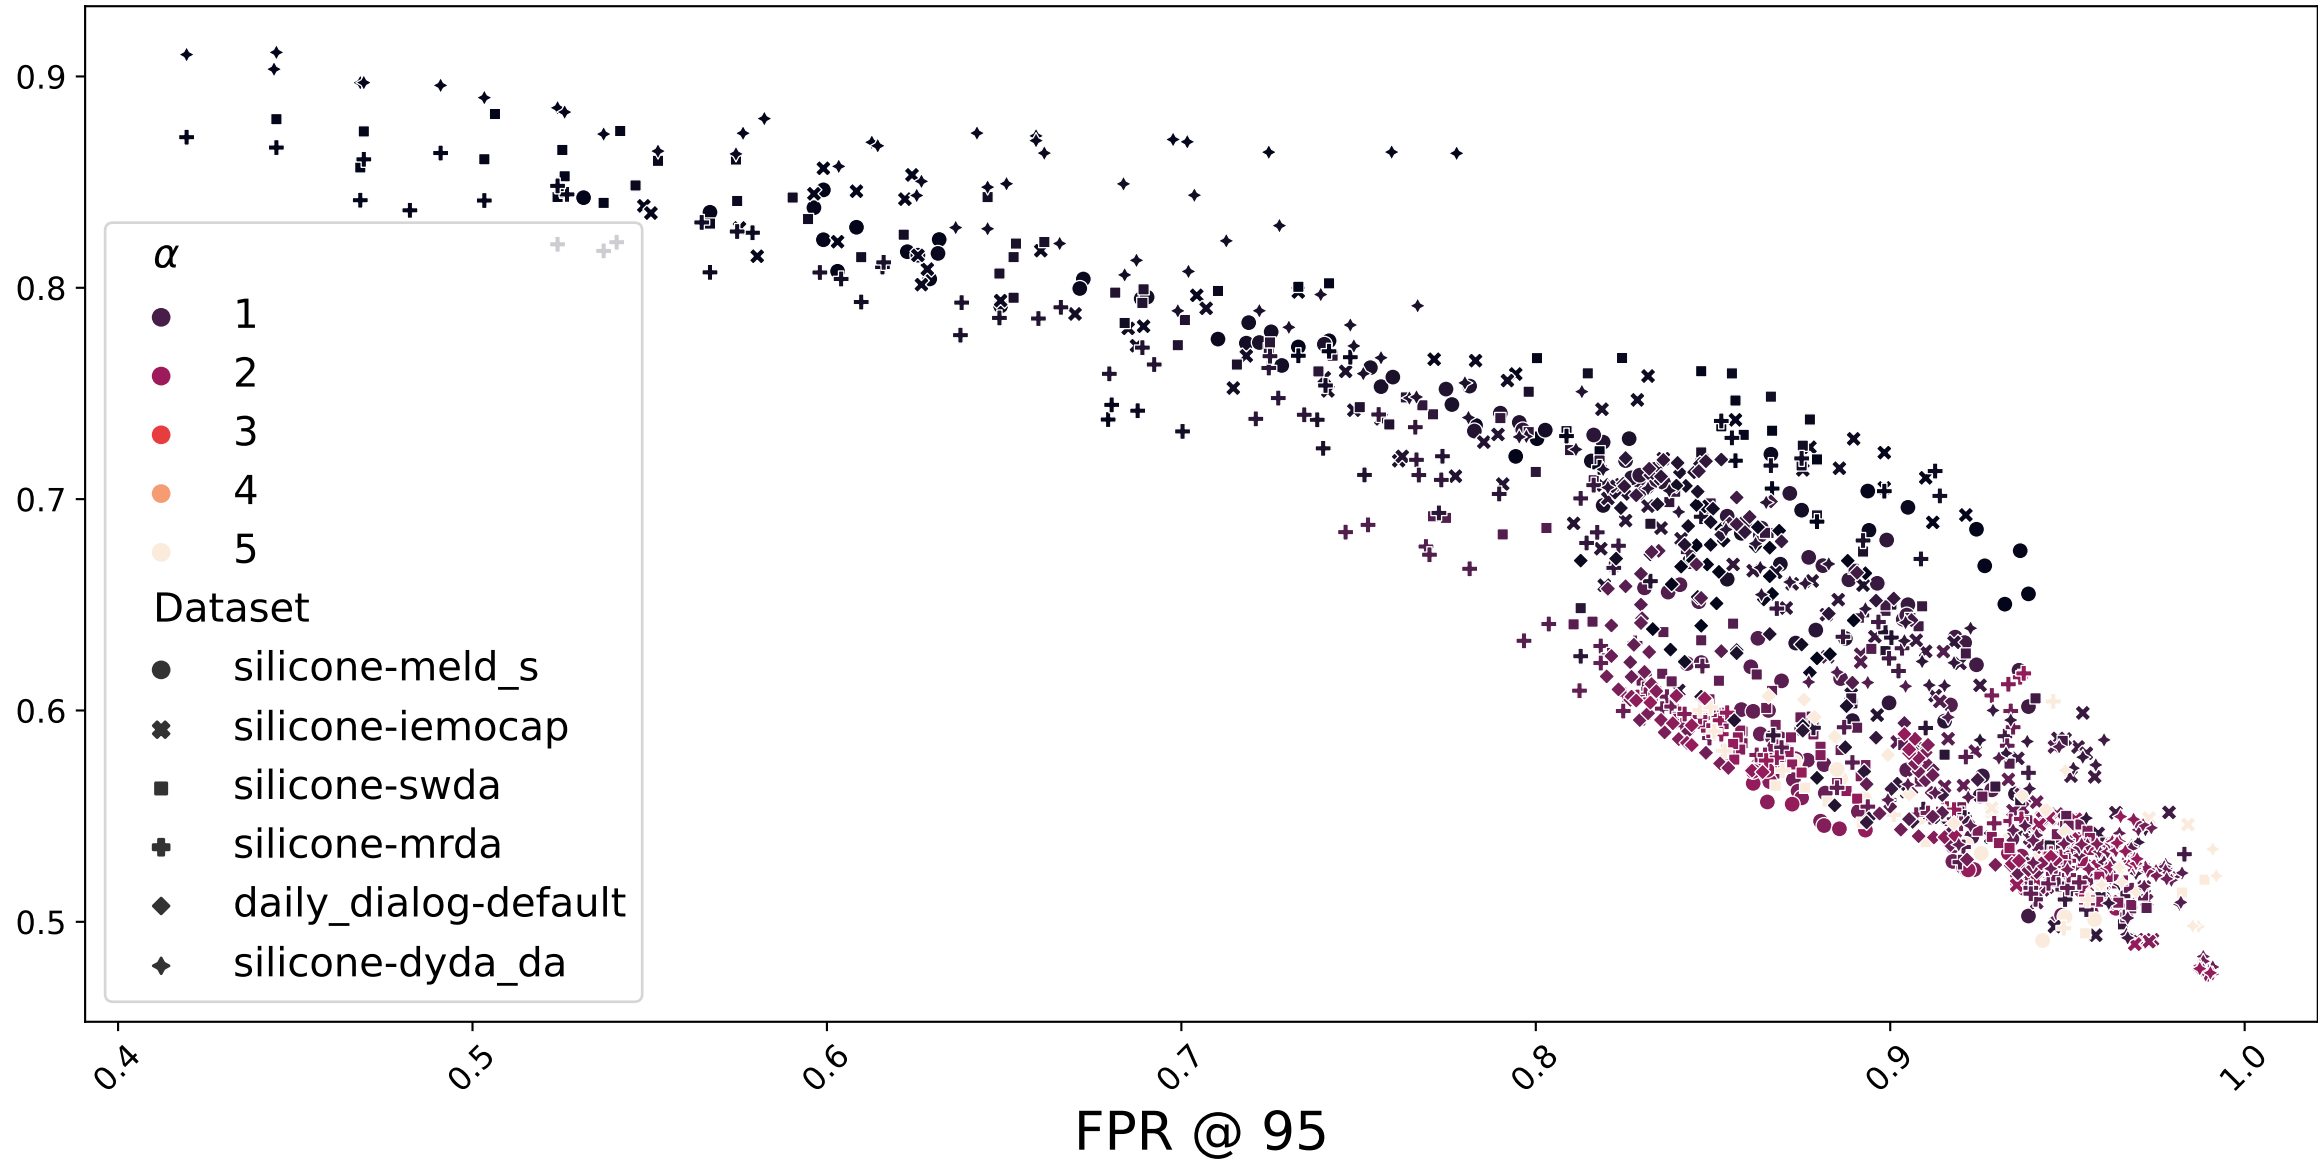

Supplement: supplementary_material [file attachment]

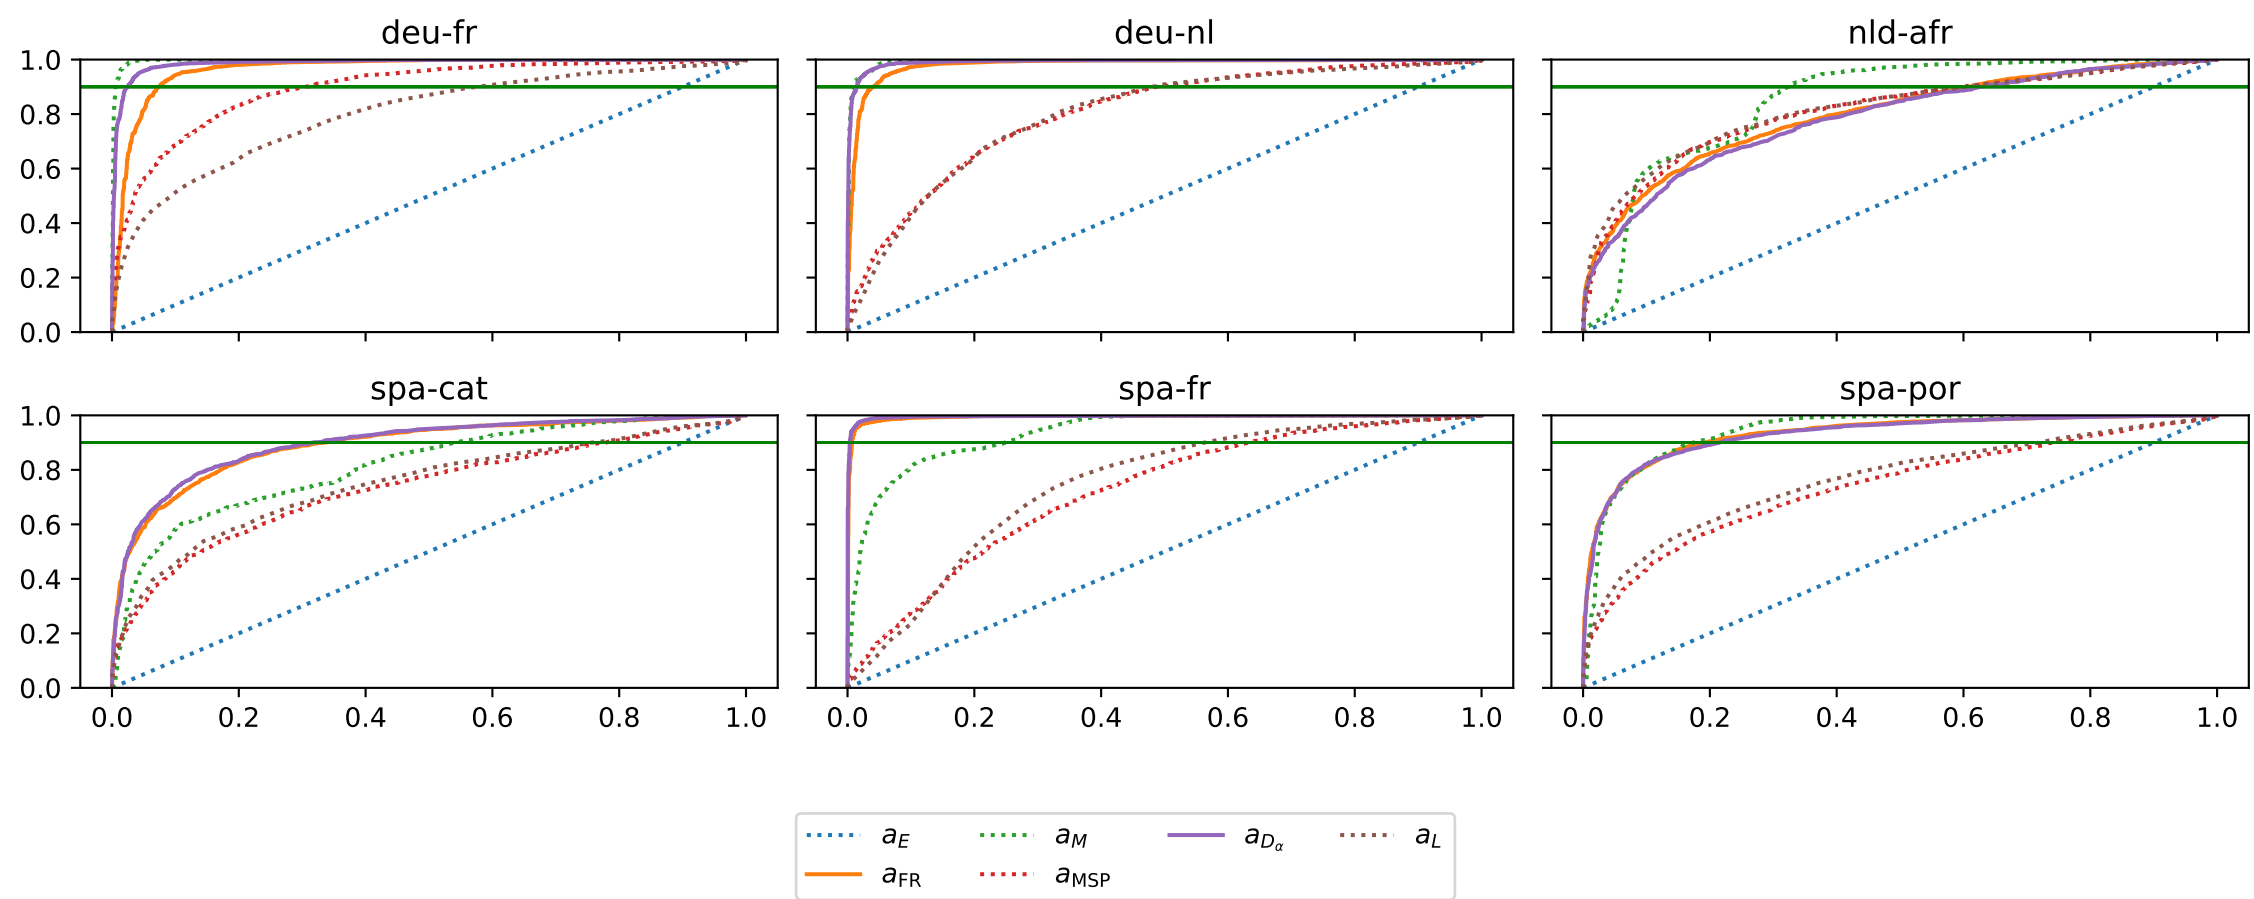

Supplement: supplementary_material [file attachment]

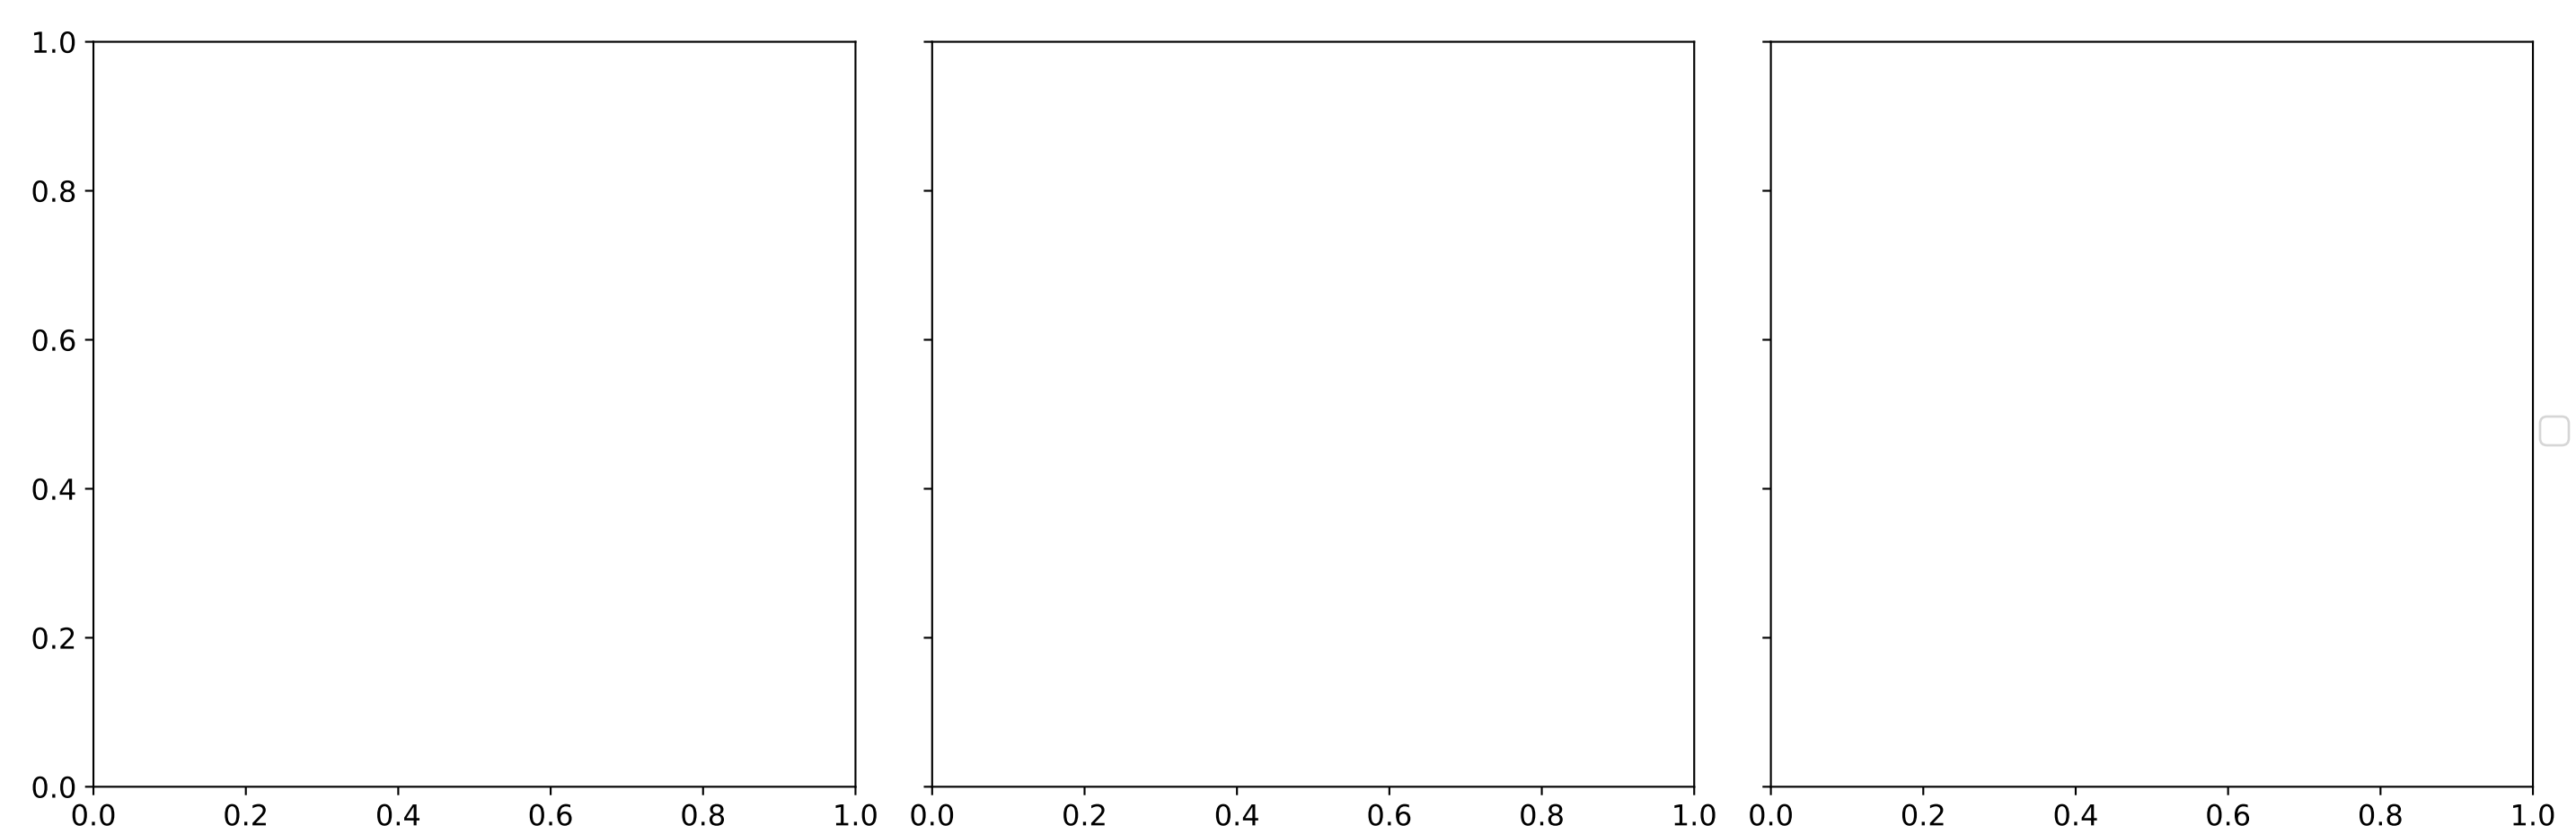

Supplement: supplementary_material [file attachment]

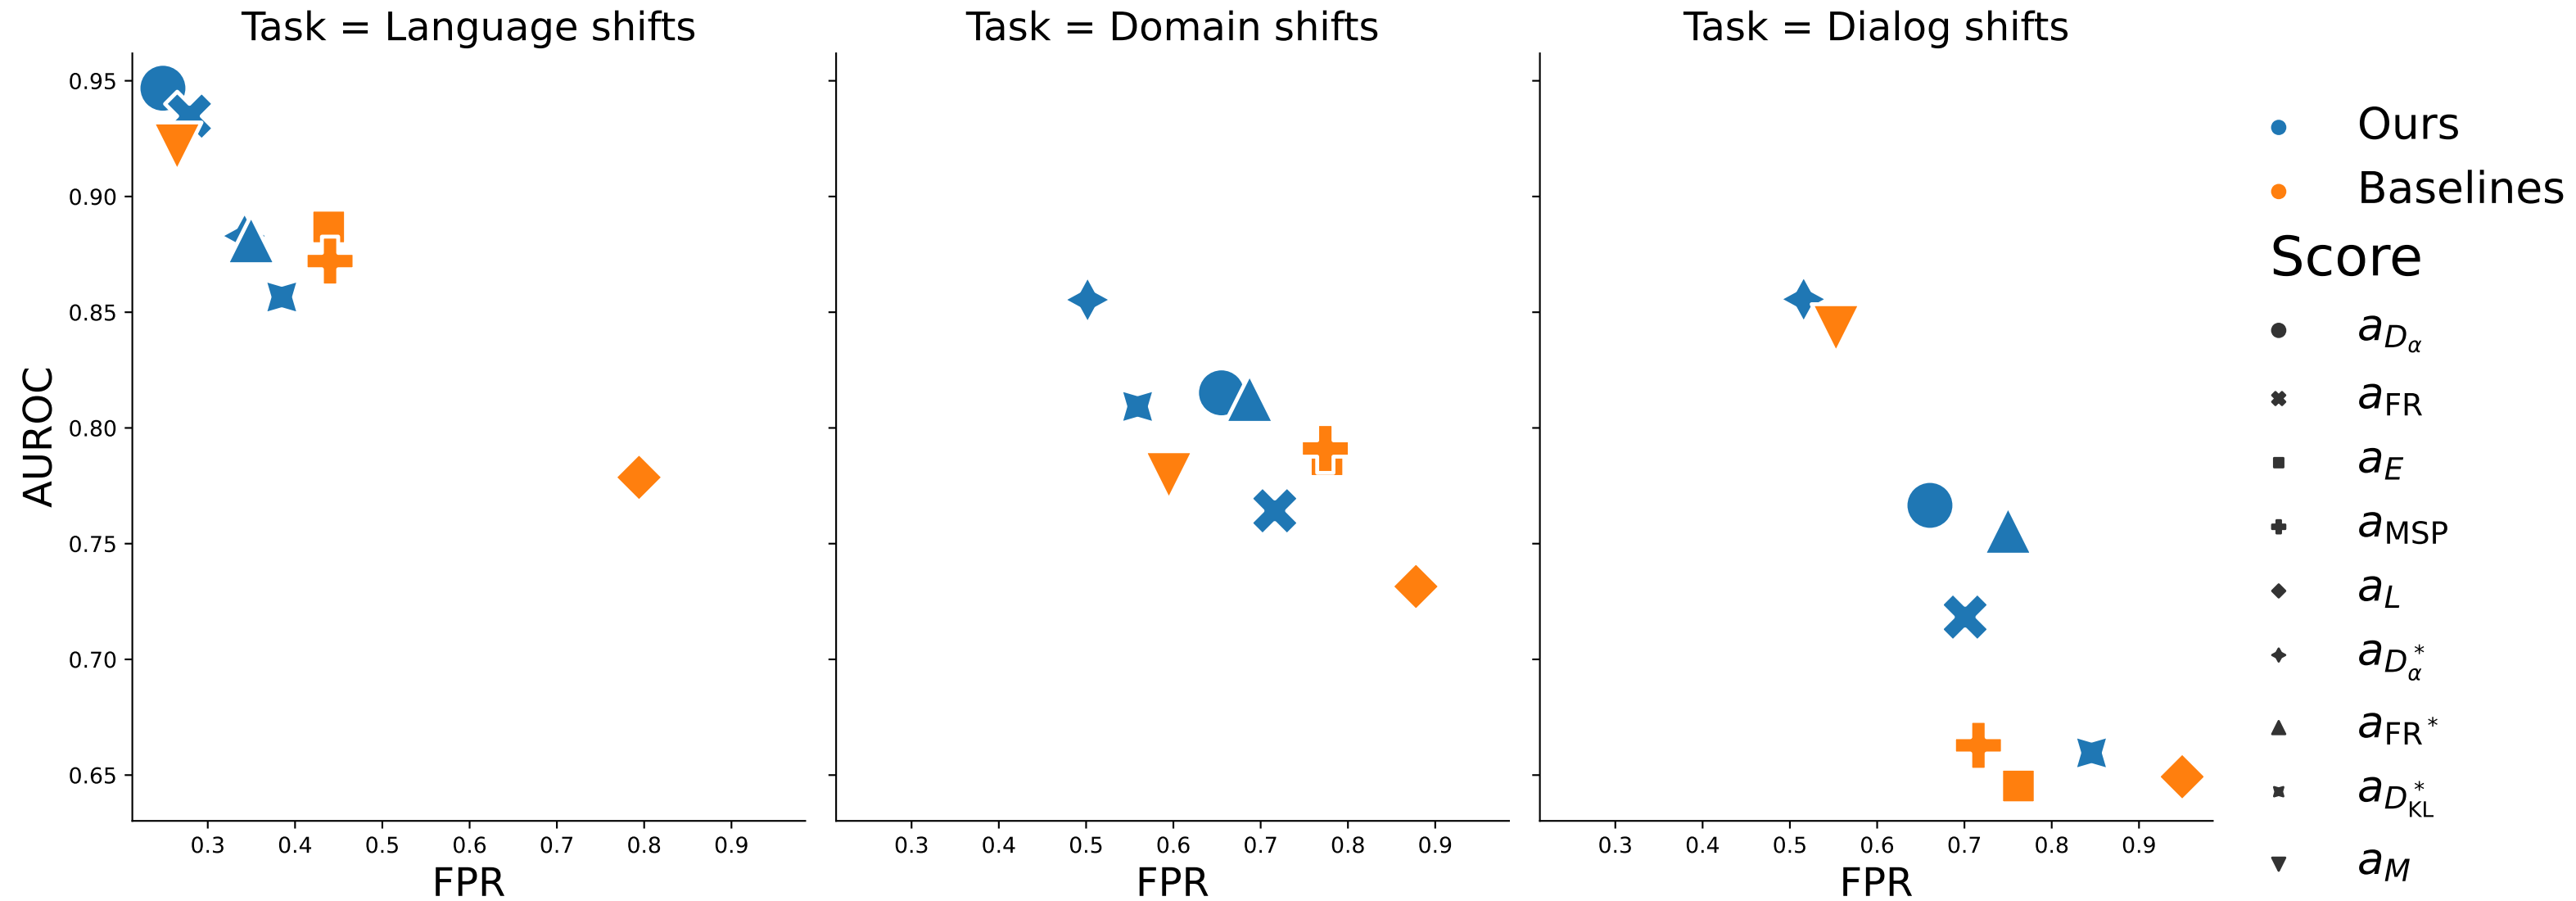

Supplement: supplementary_material [file attachment]

de:news-EMEA

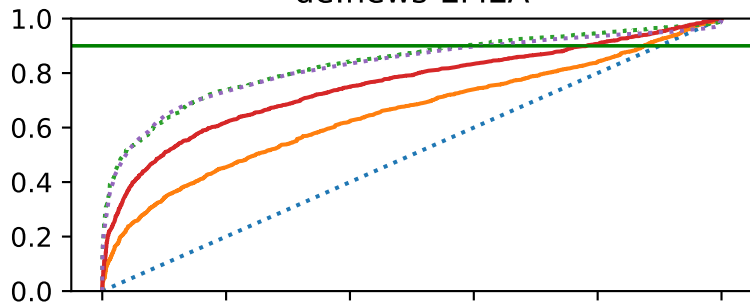

de:news-parl

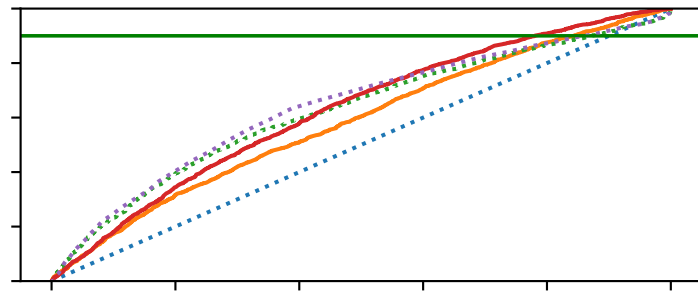

spa:tat-EMEA

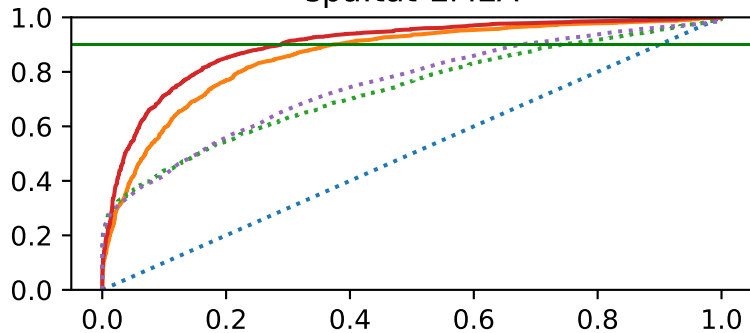

spa:tat-parl

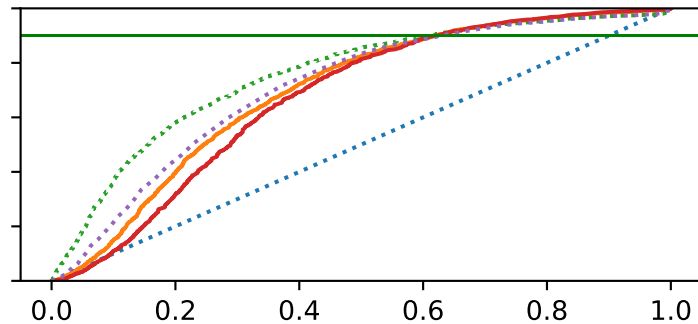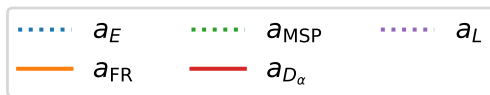

Supplement: supplementary_material [file attachment]

de:news-EMEA

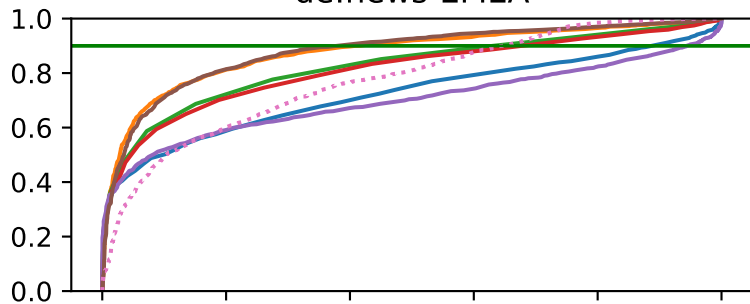

de:news-parl

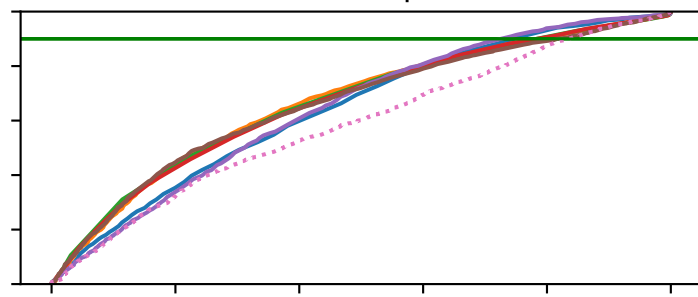

spa:tat-EMEA

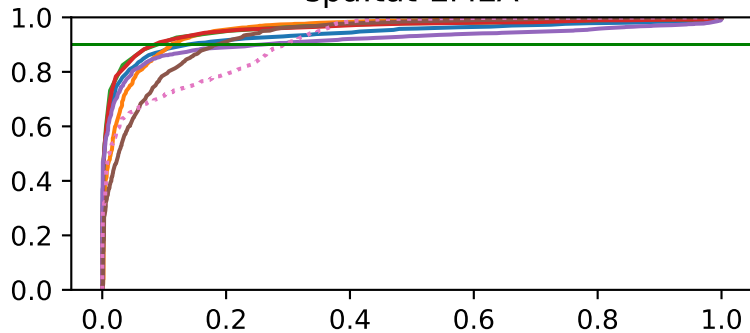

spa:tat-parl

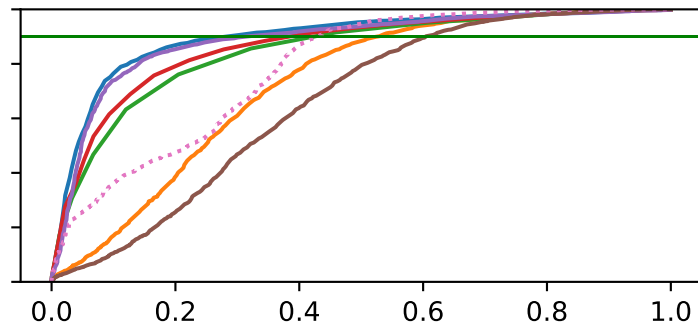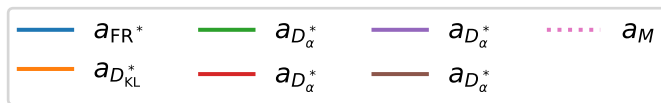

Supplement: supplementary_material [file attachment]
